# Supplementary material for: Unravelling phase-dependent electronic dimensionality and optoelectronic properties in lead-free layered A3B2X9 perovskites for photovoltaic applications
Source: Royal Society of Chemistry journal article supplement (doi:10.1039/d4tc01803f), 2024-01-01
Supplement: d4tc01803f1.pdf [file d4tc01803f1.pdf]

Supporting Information for

**Unravelling Phase-Dependent Electronic Dimensionality and  
Optoelectronic Properties in Lead-Free  $A_3B_2X_9$  Perovskites for  
Photovoltaic Applications**

Qingyuan Luo<sup>1</sup>, Dabao Xie<sup>1</sup>, Yiqian Tian<sup>1</sup>, Congmin Zhang<sup>1</sup>, Dan Cao<sup>2</sup>, Xiaoshuang  
Chen<sup>3</sup>, Pei Liang<sup>1</sup> and Haibo Shu<sup>1,\*</sup>

<sup>1</sup>College of Optical and Electronic Technology, China Jiliang University, Hangzhou  
310018, China.

<sup>2</sup>College of Science, China Jiliang University, Hangzhou 310018, China

<sup>3</sup>State Key Laboratory of Infrared Physics, Shanghai Institute of Technical Physics,  
Chinese Academy of Science, Shanghai 200083, China

\*Corresponding author. Email: [shuhaibo@cjlu.edu.cn](mailto:shuhaibo@cjlu.edu.cn)

## CONTENTS

- S1. The SOC effect on the band structure of  $A_3B_2X_9$  perovskites
- S2. Effect of materials thickness on the PCE of  $A_3B_2X_9$  perovskites
- S3. Synthetic conditions and phase structures of  $A_3B_2X_9$  perovskites in experiment
- S4. Projected band structures of  $A_3B_2X_9$  perovskites in H and T phases
- S5. Projected density of states of  $Cs_3Sb_2I_9$  perovskite in H and T phases
- S6. Illustration of the band-edge orbital coupling in  $A_3B_2X_9$  perovskites
- S7. The comparison between the calculated and experimental bandgaps of some  $A_3B_2X_9$  perovskites
- S8. Optical absorption spectra of  $A_3B_2X_9$  perovskites in H and T phases
- S9. The computational details for intrinsic defects of T-phase  $Cs_3Sb_2I_9$
- S10. Thickness effect on electronic structures of 2D T-phase  $Cs_3B_2X_9$  nanosheets
- S11. Thickness effect on optical absorption of 2D T-phase  $Cs_3B_2X_9$  nanosheets

## S1. The SOC effect on the band structure of $A_3B_2X_9$ perovskites

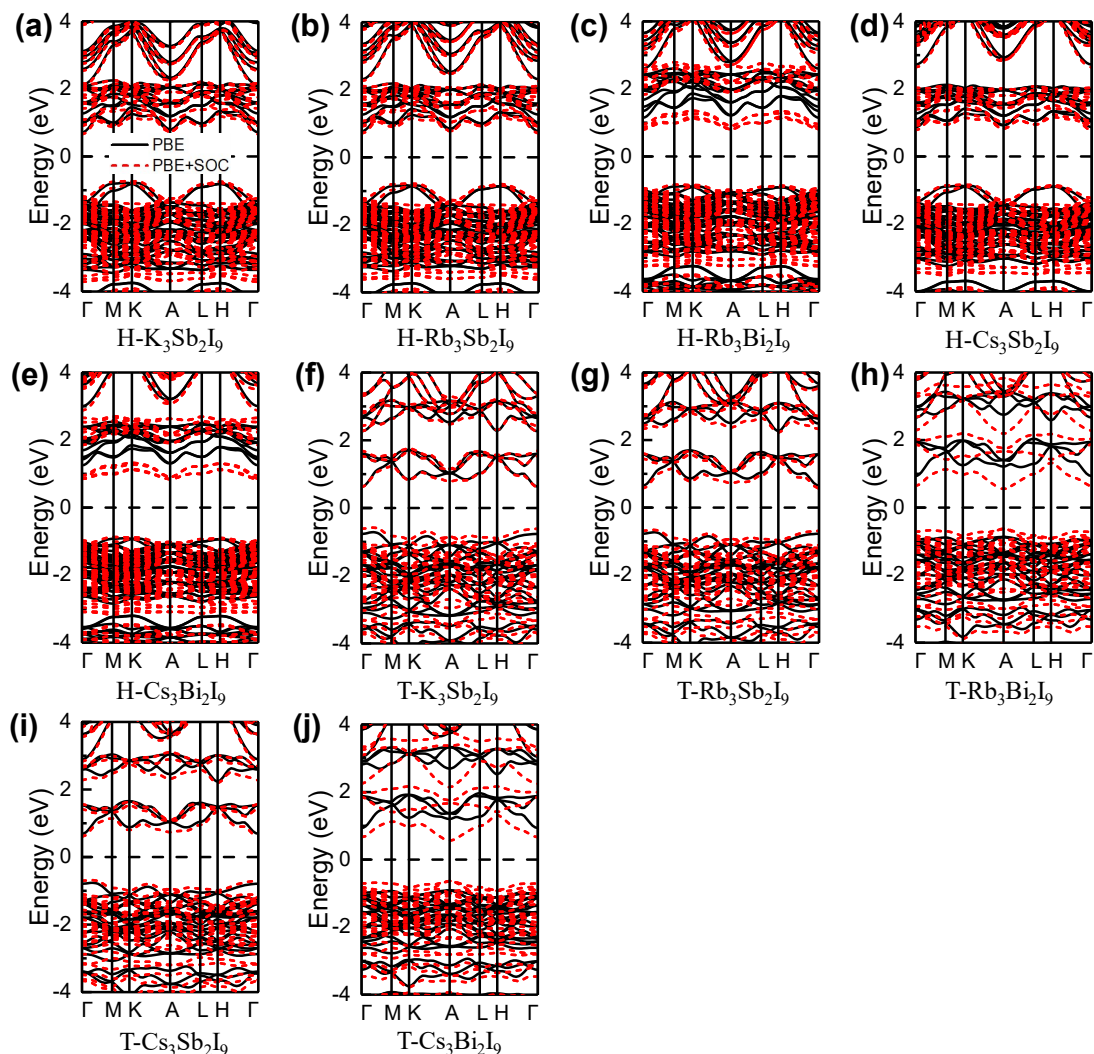

**Fig. S1** Band structures of  $A_3B_2I_9$  perovskites calculated by the PBE functional with and without SOC. The band structure of (a) H-phase  $K_3Sb_2I_9$ , (b) H-phase  $Rb_3Sb_2I_9$ , (c) H-phase  $Rb_3Bi_2I_9$ , (d) H-phase  $Cs_3Sb_2I_9$ , (e) H-phase  $Cs_3Bi_2I_9$ , (f) T-phase  $K_3Sb_2I_9$ , (g) T-phase  $Rb_3Sb_2I_9$ , (h) T-phase  $Rb_3Bi_2I_9$ , (i) T-phase  $Cs_3Sb_2I_9$ , and (j) T-phase  $Cs_3Bi_2I_9$ . The dash lines and solid lines denote the band structures calculated with and without the SOC effect, respectively. The horizontal dash lines at the energy zero point denote the position of Fermi level.

Using ten  $A_3B_2I_9$  perovskite structures as examples, their band structures are calculated by the PBE functional with and without SOC effect (Fig. S1). The band structures of  $A_3B_2I_9$  perovskites calculated by the PBE+SOC notably deviate from those obtained by the PBE functional. More specifically, the SOC effect induces the downshift of bands at the lower conduction band and upshift of bands at the higher valence band, resulting in the reduction of bandgap in these perovskites. Therefore, the SOC effect has been considered in the calculations of this work.

## S2. Effect of materials thickness on the PCE of $A_3B_2X_9$ perovskites

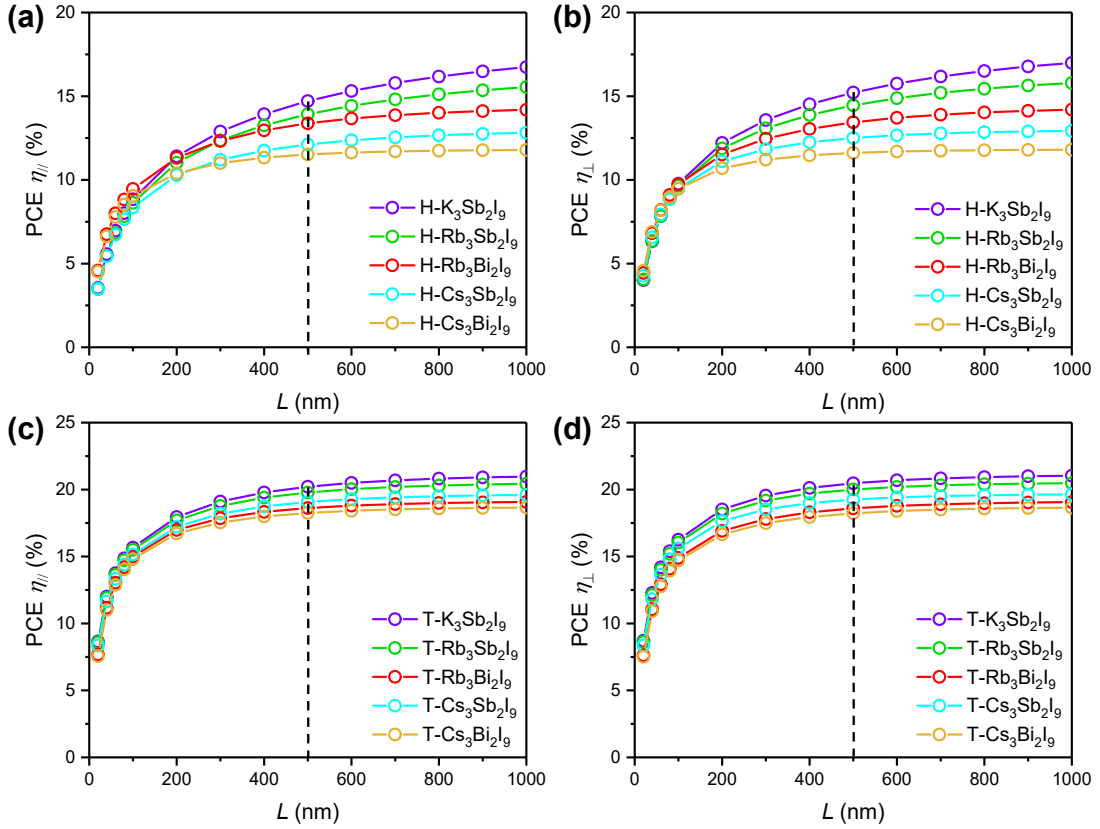

**Fig. S2** PCE ( $\eta$ ) of  $A_3B_2X_9$  perovskites as a function of material thickness ( $L$ ). (a,b) Thickness dependent PCE of H-phase  $A_3B_2I_9$  perovskites along the (a) in-plane ( $\eta_{||}$ ) and (b) out-of-plane ( $\eta_{\perp}$ ) direction. (c,d) Thickness dependent PCE of T-phase  $A_3B_2I_9$  perovskites along the (c) in-plane ( $\eta_{||}$ ) and (d) out-of-plane ( $\eta_{\perp}$ ) direction.

Using ten  $A_3B_2I_9$  perovskite structures as examples, the material thickness effect on the PCE of these perovskites are predicted by equation (6) described in main text. As shown in Fig. S2, it can be seen that the PCE value of these perovskites indicates an increase trend with increasing thickness ( $L$ ) of perovskite thin films and tends to be saturated when  $L$  arrives at  $\sim 500$  nm. Therefore, the maximum PCE value of  $A_3B_2I_9$  perovskites is predicted by using  $L = 500$  nm.

### S3. Synthetic conditions and phase structures of $A_3B_2X_9$ perovskites in experiment

**Table S1** Synthetic conditions and phase structures of  $A_3B_2X_9$  perovskites reported in experiment.

| <b>Materials</b> | <b>Phase</b> | <b>Temperature (K)</b> | <b>Precursors</b>                                     | <b>Method</b>   | <b>Ref.</b> |
|------------------|--------------|------------------------|-------------------------------------------------------|-----------------|-------------|
| $Cs_3Sb_2Cl_9$   | T            | 313-358                | CsCl+SbCl <sub>3</sub>                                | Solution method | [1]         |
| $Cs_3Sb_2Br_9$   | T            | 403                    | CsBr+SbBr <sub>3</sub>                                | Solution method | [2]         |
| $Cs_3Sb_2I_9$    | T            | 973                    | CsI+SbI <sub>3</sub>                                  | CVD             | [3]         |
| $Cs_3Sb_2I_9$    | H            | 348                    | CsI+SbI <sub>3</sub>                                  | Solution method | [4]         |
| $Cs_3Bi_2Cl_9$   | T            | 433                    | Bi(OAc) <sub>3</sub> +Cs <sub>2</sub> CO <sub>3</sub> | Solution method | [5]         |
| $Cs_3Bi_2Br_9$   | T            | 353                    | CsBr+BiBr <sub>3</sub>                                | Solution method | [6]         |
| $Cs_3Bi_2I_9$    | H            | 973                    | CsI+BiI <sub>3</sub>                                  | CVD             | [3]         |

#### S4. Projected band structures of $A_3B_2X_9$ perovskites in H and T phases

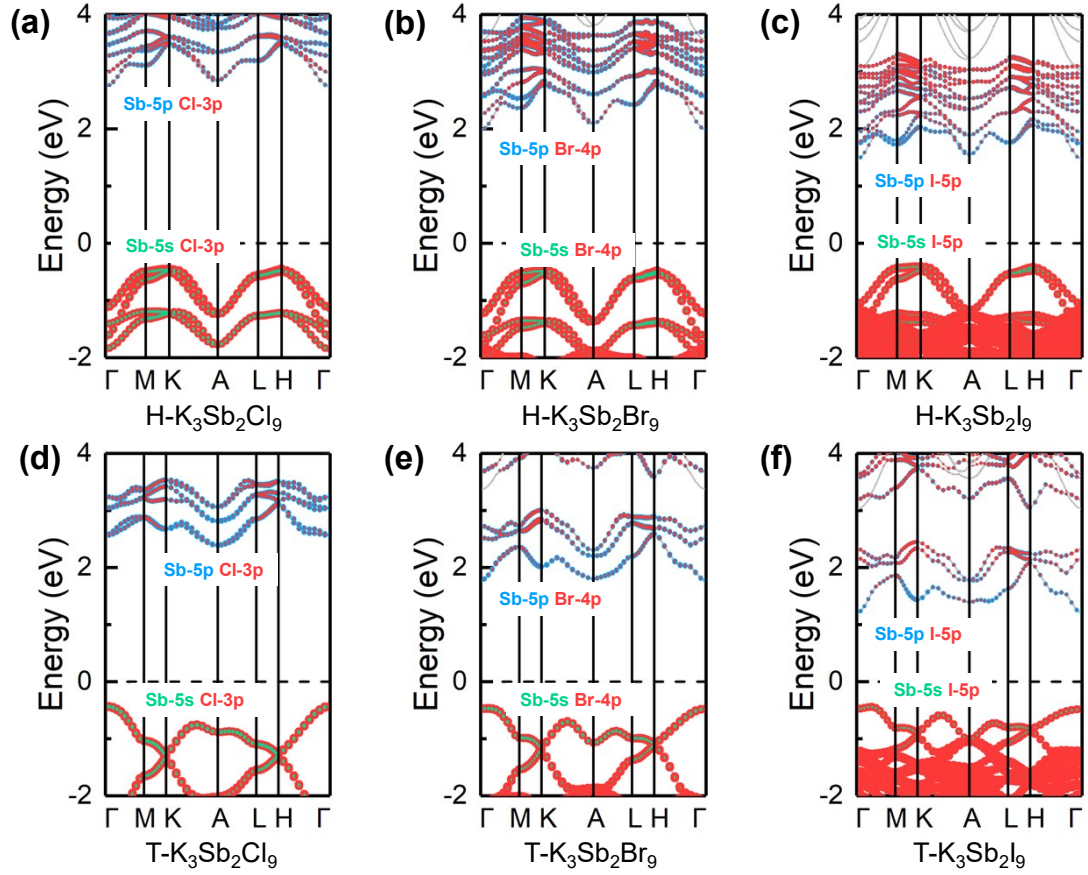

**Fig. S3** Projected band structures of  $K_3B_2X_9$  ( $B = Sb$ ) perovskites in H and T phases. Projected band structure of (a) H-phase  $K_3Sb_2Cl_9$ , (b) H-phase  $K_3Sb_2Br_9$ , (c) H-phase  $K_3Sb_2I_9$ , (d) T-phase  $K_3Sb_2Cl_9$ , (e) T-phase  $K_3Sb_2Br_9$ , (f) T-phase  $K_3Sb_2I_9$ . The dash lines denote the position of Fermi level.

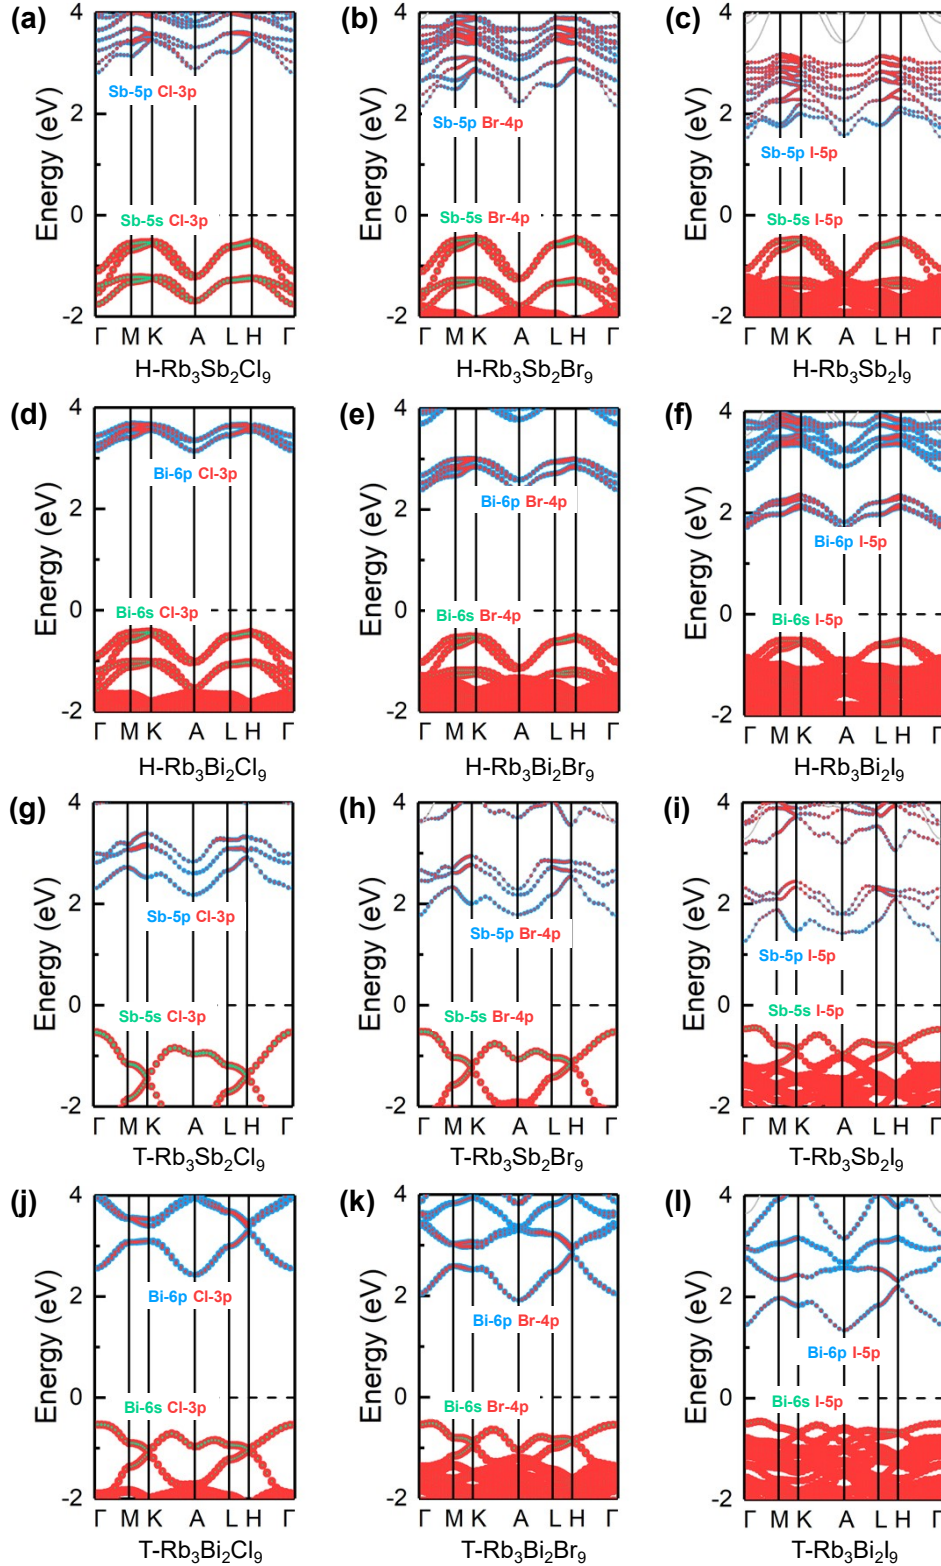

**Fig. S4** Projected band structures of  $\text{Rb}_3\text{B}_2\text{X}_9$  ( $\text{B} = \text{Sb}, \text{Bi}$ ) perovskites in H and T phases. Projected band structure of (a) H-phase  $\text{Rb}_3\text{Sb}_2\text{Cl}_9$ , (b) H-phase  $\text{Rb}_3\text{Sb}_2\text{Br}_9$ , (c) H-phase  $\text{Rb}_3\text{Sb}_2\text{I}_9$ , (d) H-phase  $\text{Rb}_3\text{Bi}_2\text{Cl}_9$ , (e) H-phase  $\text{Rb}_3\text{Bi}_2\text{Br}_9$ , (f) H-phase  $\text{Rb}_3\text{Bi}_2\text{I}_9$ , (g) T-phase  $\text{Rb}_3\text{Sb}_2\text{Cl}_9$ , (h) T-phase  $\text{Rb}_3\text{Sb}_2\text{Br}_9$ , (i) T-phase  $\text{Rb}_3\text{Sb}_2\text{I}_9$ , (j) T-phase  $\text{Rb}_3\text{Bi}_2\text{Cl}_9$ , (k) T-phase  $\text{Rb}_3\text{Bi}_2\text{Br}_9$ , (l) T-phase  $\text{Rb}_3\text{Bi}_2\text{I}_9$ . The dash lines denote the position of Fermi level.

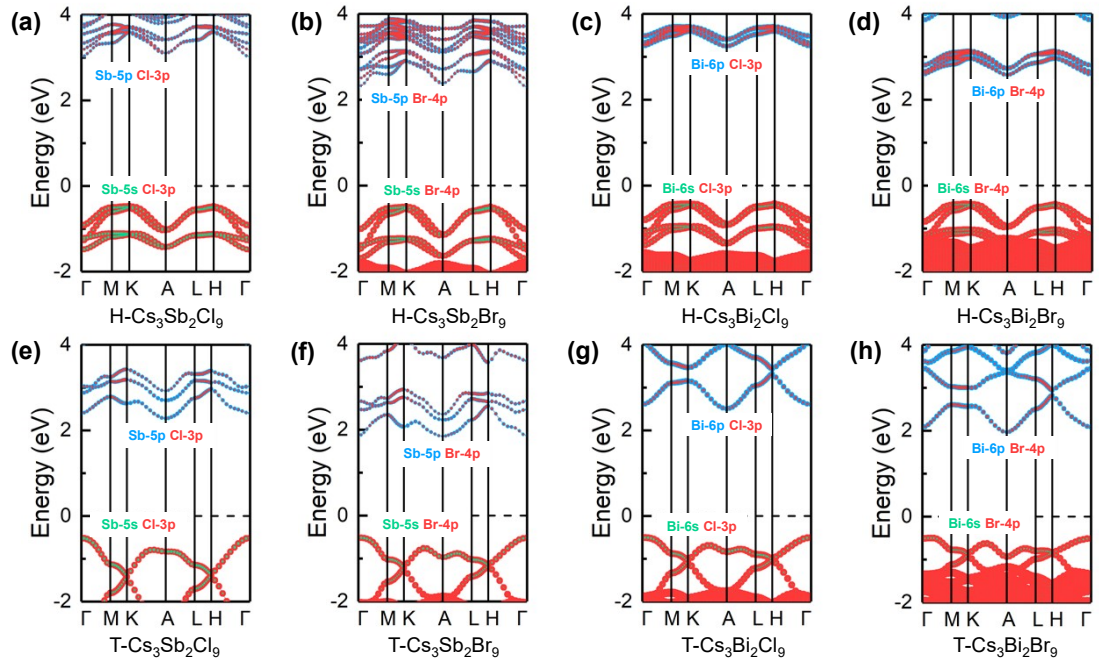

**Fig. S5** Projected band structures of  $\text{Cs}_3\text{B}_2\text{X}_9$  ( $\text{B} = \text{Sb}, \text{Bi}$ ) perovskites in H and T phases. Projected band structure of (a) H-phase  $\text{Cs}_3\text{Sb}_2\text{Cl}_9$ , (b) H-phase  $\text{Cs}_3\text{Sb}_2\text{Br}_9$ , (c) H-phase  $\text{Cs}_3\text{Bi}_2\text{Cl}_9$ , (d) H-phase  $\text{Cs}_3\text{Bi}_2\text{Br}_9$ , (e) T-phase  $\text{Cs}_3\text{Sb}_2\text{Cl}_9$ , (f) T-phase  $\text{Cs}_3\text{Sb}_2\text{Br}_9$ , (g) T-phase  $\text{Cs}_3\text{Bi}_2\text{Cl}_9$ , (h) T-phase  $\text{Cs}_3\text{Bi}_2\text{Br}_9$ . The dash lines denote the position of Fermi level.



### S5. Projected density of states of $\text{Cs}_3\text{Sb}_2\text{I}_9$ perovskite in H and T phases

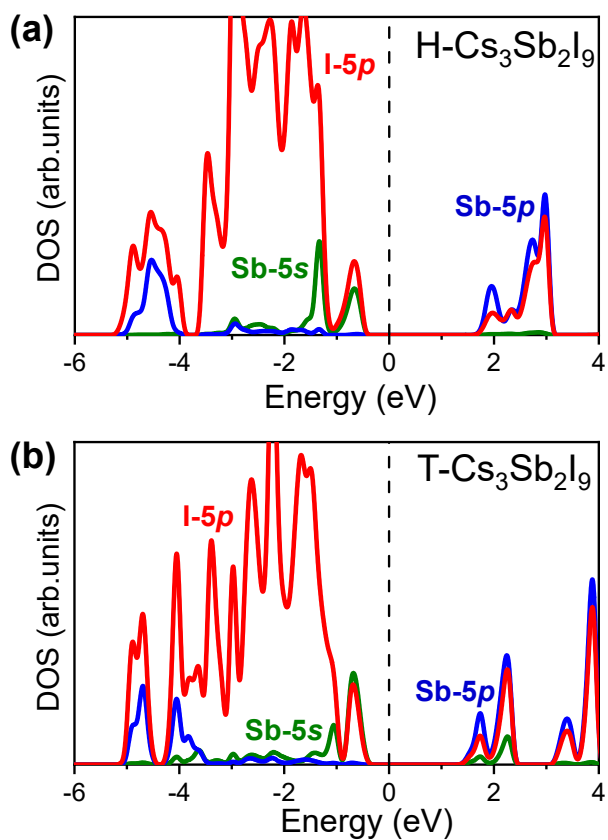

**Fig. S6** Projected density of states of (a) H-phase  $\text{Cs}_3\text{Sb}_2\text{I}_9$  and (b) T-phase  $\text{Cs}_3\text{Sb}_2\text{I}_9$ . The dashed lines denote the position of Fermi level.

## S6. Illustration of the band-edge orbital coupling in $A_3B_2X_9$ perovskites

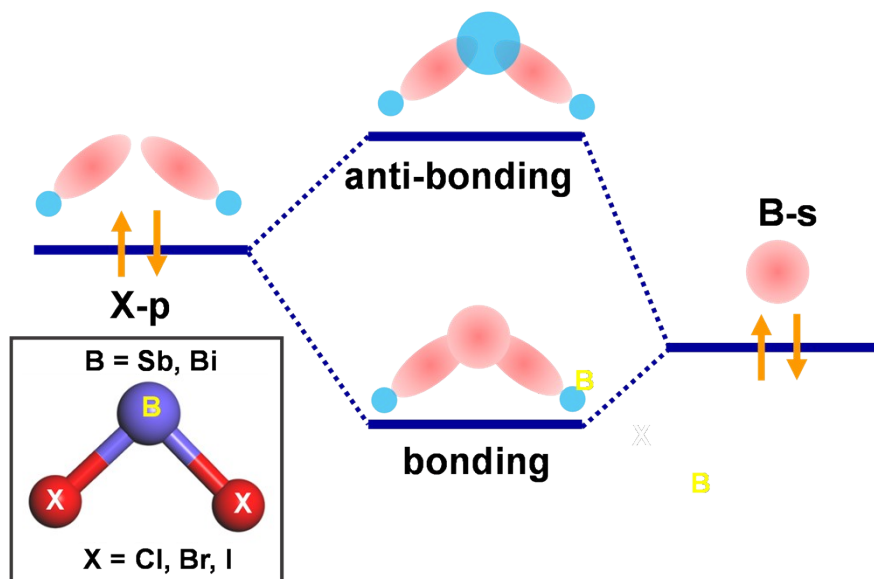

**Fig. S7** Schematic illustration of the band-edge orbital interactions in  $A_3B_2X_9$  perovskites with lone pairs. The  $s-p$  orbital interactions between the B-site cations and X anions create filled bonding and antibonding combinations.

## S7. The comparison between the calculated and experimental bandgaps of some $A_3B_2X_9$ perovskites

**Table S2** The comparison of the calculated (Cal.) and experimental (Exp.) bandgaps (in eV) of bulk  $A_3B_2X_9$  perovskites. The calculated bandgaps were obtained by the HSE06 functional in this work, and the experimental bandgaps were extracted from previous literatures.<sup>1, 4-8</sup>

| Materials                           | Phase structure | Cal. | Exp.              |
|-------------------------------------|-----------------|------|-------------------|
| $\text{Cs}_3\text{Sb}_2\text{Cl}_9$ | T               | 2.79 | 2.89 <sup>1</sup> |
| $\text{Cs}_3\text{Sb}_2\text{Br}_9$ | T               | 2.36 | 2.36 <sup>7</sup> |
| $\text{Cs}_3\text{Sb}_2\text{I}_9$  | T               | 1.76 | 1.89 <sup>8</sup> |
| $\text{Cs}_3\text{Sb}_2\text{I}_9$  | H               | 2.21 | 2.02 <sup>4</sup> |
| $\text{Cs}_3\text{Bi}_2\text{Cl}_9$ | T               | 3.01 | 3.09 <sup>5</sup> |
| $\text{Cs}_3\text{Bi}_2\text{Br}_9$ | T               | 2.47 | 2.64 <sup>6</sup> |
| $\text{Cs}_3\text{Bi}_2\text{I}_9$  | H               | 2.29 | 2.06 <sup>8</sup> |

## S8. Optical absorption spectra of $A_3B_2X_9$ perovskites in H and T phases

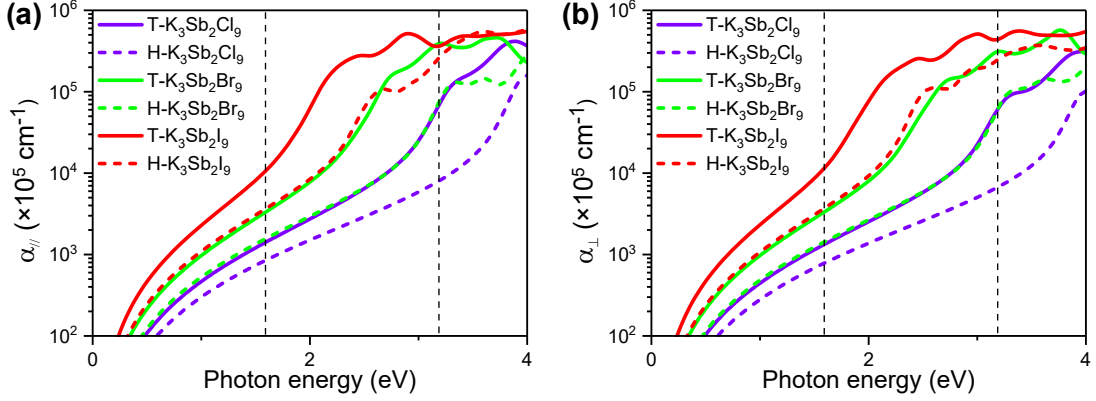

**Fig. S8** Optical absorption spectra of T- and H-phase  $K_3B_2X_9$  perovskites. Optical absorption spectra of T-phase and H-phase  $K_3Sb_2X_9$  perovskites along (a) in-plane ( $\alpha_{//}$ ) and (b) out-of-plane ( $\alpha_{\perp}$ ) direction. The range of dash lines corresponds to the visible-light region with the wavelength range from 390 to 780 nm.

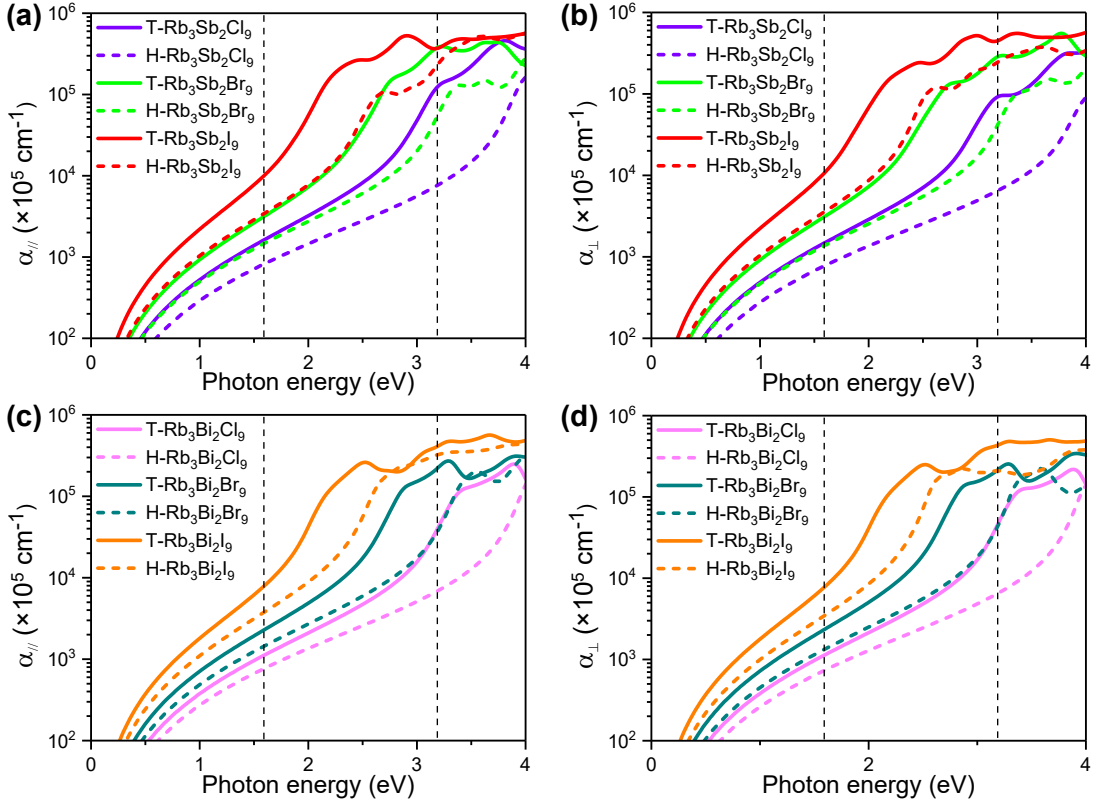

**Fig. S9** Optical absorption spectra of T- and H-phase  $Rb_3B_2X_9$  perovskites. Optical absorption spectra of T-phase and H-phase  $Rb_3Sb_2X_9$  perovskites along (a) in-plane ( $\alpha_{//}$ ) and (b) out-of-plane ( $\alpha_{\perp}$ ) direction. Optical absorption spectra of T-phase and H-phase  $Rb_3Bi_2X_9$  perovskites along (c) in-plane ( $\alpha_{//}$ ) and (d) out-of-plane ( $\alpha_{\perp}$ ) direction. The range of dash lines corresponds to the visible-light region with the wavelength range from 390 to 780 nm.

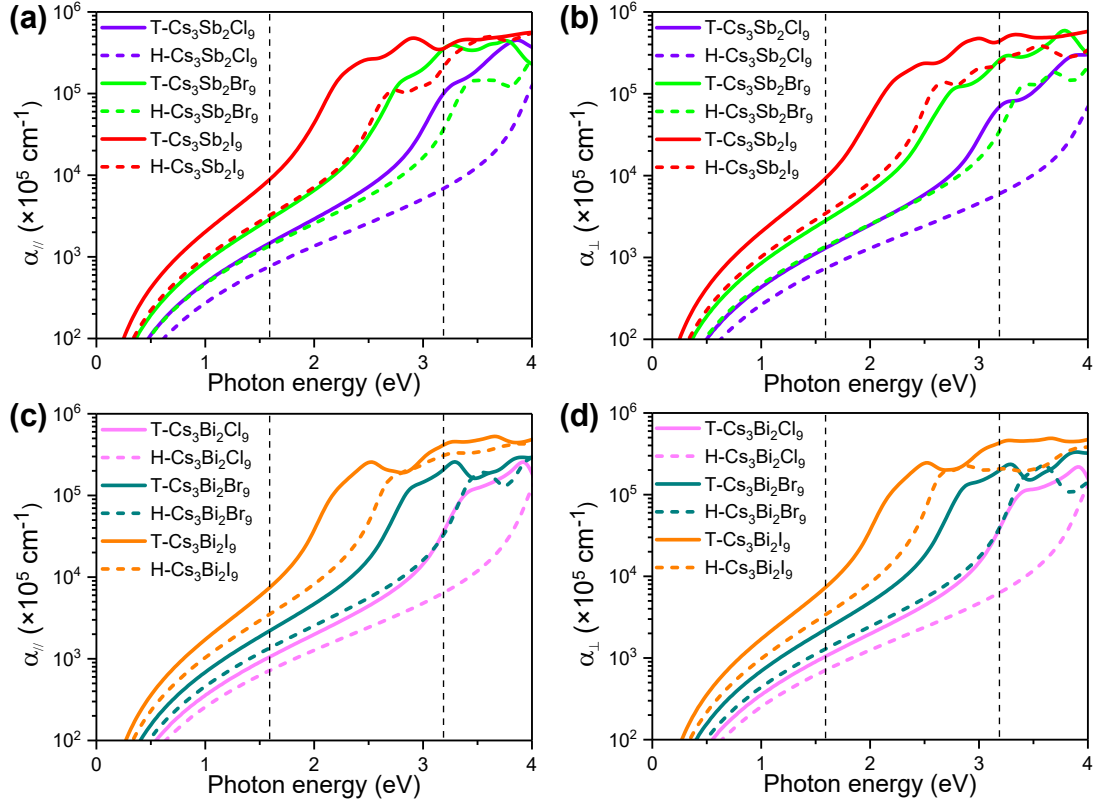

**Fig. S10** Optical absorption spectra of T- and H-phase  $\text{Cs}_3\text{B}_2\text{X}_9$  perovskites. Optical absorption spectra of T-phase and H-phase  $\text{Cs}_3\text{Sb}_2\text{X}_9$  perovskites along (a) in-plane ( $\alpha_{//}$ ) and (b) out-of-plane ( $\alpha_{\perp}$ ) direction. Optical absorption spectra of T-phase and H-phase  $\text{Cs}_3\text{Bi}_2\text{X}_9$  perovskites along (c) in-plane ( $\alpha_{//}$ ) and (d) out-of-plane ( $\alpha_{\perp}$ ) direction. The range of dash lines corresponds to the visible-light region with the wavelength range from 390 to 780 nm.

## S9. The computational details for intrinsic defects of T-phase Cs<sub>3</sub>Sb<sub>2</sub>I<sub>9</sub>

In order to understand the defect formation in A<sub>3</sub>B<sub>2</sub>X<sub>9</sub> perovskites, we used T-phase Cs<sub>3</sub>Sb<sub>2</sub>I<sub>9</sub> as an example. Ten potential intrinsic point defects were considered, including three vacancy defects (V<sub>Cs</sub>, V<sub>Sb</sub>, and V<sub>I</sub>), four antisite defects (Sb<sub>Cs</sub>, Cs<sub>Sb</sub>, Cs<sub>I</sub>, Sb<sub>I</sub>), and three interstitial atoms (I<sub>Cs</sub>, I<sub>Sb</sub>, and I<sub>I</sub>). The defect models were constructed by introducing the point defects into a (2×2×2) supercell including 112 atoms. The stability of these intrinsic point defects was evaluated by the defect formation energy ( $\Delta H_f$ ) as follows,<sup>9</sup>

$$\Delta H_f = E_D - E_P + \sum_i \Delta n_i \mu_i \quad (1)$$

where  $E_D$  is the total energy of the defective system,  $E_P$  is the total energy of the perfect Cs<sub>3</sub>Sb<sub>2</sub>I<sub>9</sub> system,  $\mu_i$  is the chemical potential of atomic species  $i$  ( $i = \text{Cs, Sb, and I}$ ), and  $\Delta n_i$  is the difference of the number of atomic species  $i$  between the defective and perfect systems. In the equilibrium conditions, the chemical potential of Cs, Sb, and I should satisfy  $3\mu_{\text{Cs}} + 2\mu_{\text{Sb}} + 9\mu_{\text{I}} = E_T(\text{Cs}_3\text{Sb}_2\text{I}_9)$ , where  $E_T$  is the total energy of Cs<sub>3</sub>Sb<sub>2</sub>I<sub>9</sub> per formula cell. It can be transformed into the following equation,

$$3\Delta\mu_{\text{Cs}} + 2\Delta\mu_{\text{Sb}} + 9\Delta\mu_{\text{I}} = \Delta H_f(\text{Cs}_3\text{Sb}_2\text{I}_9) \quad (2)$$

where  $\Delta H_f(\text{Cs}_3\text{Sb}_2\text{I}_9)$  is the enthalpy of formation of Cs<sub>3</sub>Sb<sub>2</sub>I<sub>9</sub>. In order to ensure the formation of Cs<sub>3</sub>Sb<sub>2</sub>I<sub>9</sub>, the secondary phases CsI and SbI<sub>3</sub> as well as the element crystals Cs, Sb, and I need to be avoided, so the chemical potentials and enthalpies of binary compounds should satisfy the following constraint conditions:

$$\Delta\mu_{\text{Cs}} + \Delta\mu_{\text{I}} < \Delta H_f(\text{CsI}) \quad (3)$$

$$\Delta\mu_{\text{Sb}} + 3\Delta\mu_{\text{I}} < \Delta H_f(\text{SbI}_3) \quad (4)$$

By means of the equations (2)–(4), the allowed range of chemical potentials for the formation of T-phase Cs<sub>3</sub>Sb<sub>2</sub>I<sub>9</sub> can be determined, as shown in the gray shaded region of Fig. S11. The allowed chemical potential range is surrounded by the critical points A–C. The point A corresponds to I-rich condition, and the chemical potential at the points B and C can be determined by the equation (2). According to the allowed

chemical potential range, we calculated the defect formation energy of ten intrinsic point defects, as listed in Table S3. It can be seen that the Cs vacancy ( $V_{Cs}$ ) and I vacancy ( $V_I$ ) are the most two stable defect structures in the allowed chemical potential range. Furthermore, we calculated the band structure of  $Cs_3Sb_2I_9$  with  $V_{Cs}$  and  $V_I$ , respectively. The band structure of perfect  $Cs_3Sb_2I_9$  was also calculated for comparison. As shown in Fig. S12,  $Cs_3Sb_2I_9$  with  $V_{Cs}$  indicates a p-type character and  $Cs_3Sb_2I_9$  with  $V_I$  exhibits a n-type character. For both of two defect structures, they do not induce the formation of deep defect levels.

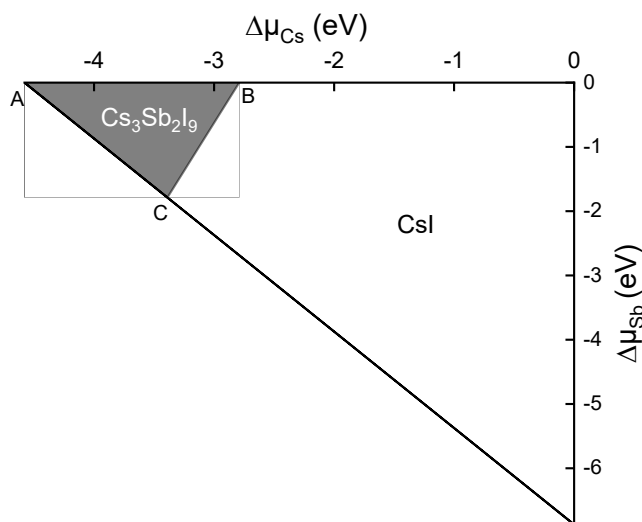

**Fig. S11** Calculated stable phase diagram of T-phase  $Cs_3Sb_2I_9$  as a function of the chemical potentials of Cs ( $\mu_{Cs}$ ) and Sb ( $\mu_{Sb}$ ). The gray area is the thermodynamically stable range for the equilibrium growth of  $Cs_3Sb_2I_9$ . The stable region is surrounded by points A-C.

**Table S3** Defect formation energies ( $\Delta H_f$ ) of ten intrinsic point defects in T-phase  $Cs_3Sb_2I_9$  under the equilibrium conditions of three chemical potential conditions. The three chemical potential conditions correspond to three critical points A, B, and C in Fig. S11.

| Intrinsic defects | Defect formation energy $\Delta H_f$ (in eV) |             |             |
|-------------------|----------------------------------------------|-------------|-------------|
|                   | A                                            | B           | C           |
| $V_{Cs}$          | <b>-0.24</b>                                 | 1.55        | <b>0.95</b> |
| $V_{Sb}$          | 3.22                                         | 3.22        | 1.43        |
| $V_I$             | 1.93                                         | <b>1.33</b> | 1.93        |
| $Sb_{Cs}$         | 1.81                                         | 3.60        | 4.79        |
| $Cs_{Sb}$         | 4.98                                         | 3.19        | 2.00        |
| $Cs_I$            | 4.51                                         | 2.12        | 3.32        |
| $Sb_I$            | 2.75                                         | 2.15        | 4.54        |
| $I_{Cs}$          | 3.76                                         | 1.97        | 2.57        |
| $I_{Sb}$          | 1.77                                         | 1.77        | 3.56        |
| $I_I$             | 1.35                                         | 1.95        | 1.35        |

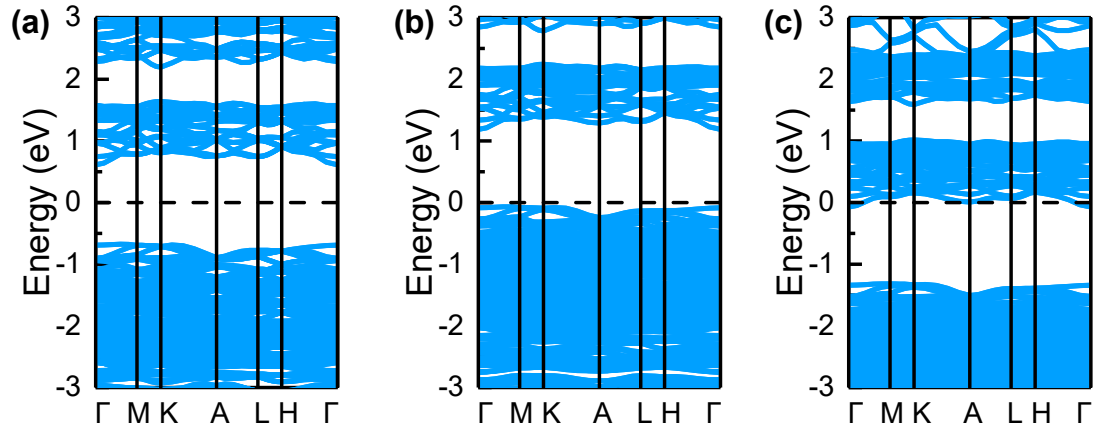

**Fig. S12** Band structure of (a) perfect T-phase  $\text{Cs}_3\text{Sb}_2\text{I}_9$ , (b) T-phase  $\text{Cs}_3\text{Sb}_2\text{I}_9$  with a Cs vacancy, (c) T-phase  $\text{Cs}_3\text{Sb}_2\text{I}_9$  with a I vacancy. The dash lines denote the position of Fermi level.

### S10. Thickness effect on electronic structures of 2D T-phase $\text{Cs}_3\text{B}_2\text{X}_9$ nanosheets

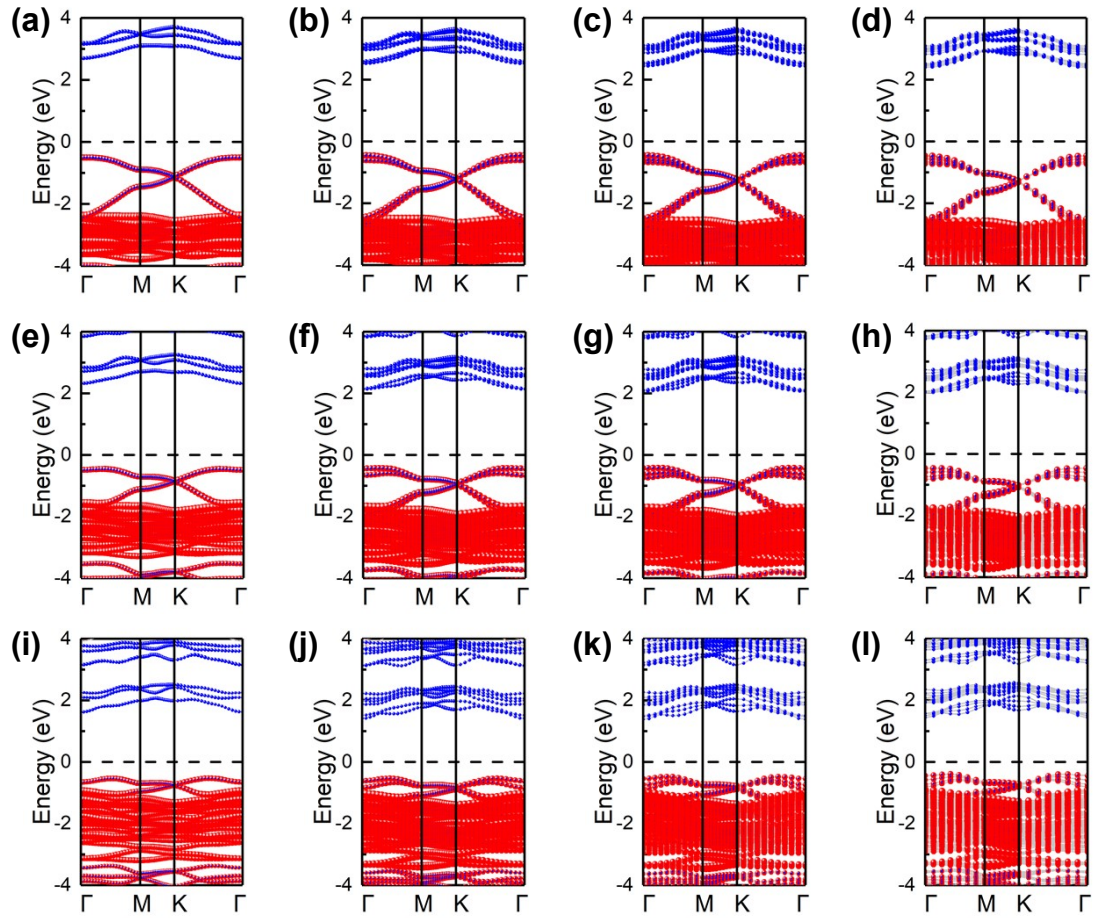

**Fig. S13** Thickness effect on band structures of 2D T-phase  $\text{Cs}_3\text{Sb}_2\text{X}_9$  ( $\text{X} = \text{Cl}, \text{Br}, \text{I}$ ) nanosheets. Projected band structure of (a-d)  $\text{Cs}_3\text{Sb}_2\text{Cl}_9$ , (e-h)  $\text{Cs}_3\text{Sb}_2\text{Br}_9$ , (i-l)  $\text{Cs}_3\text{Sb}_2\text{I}_9$  with the thickness range from the monolayer (1L) to tetralayer (4L). The blue and red bands are contributed by Sb and X, respectively. The dash lines denote the position of Fermi level.



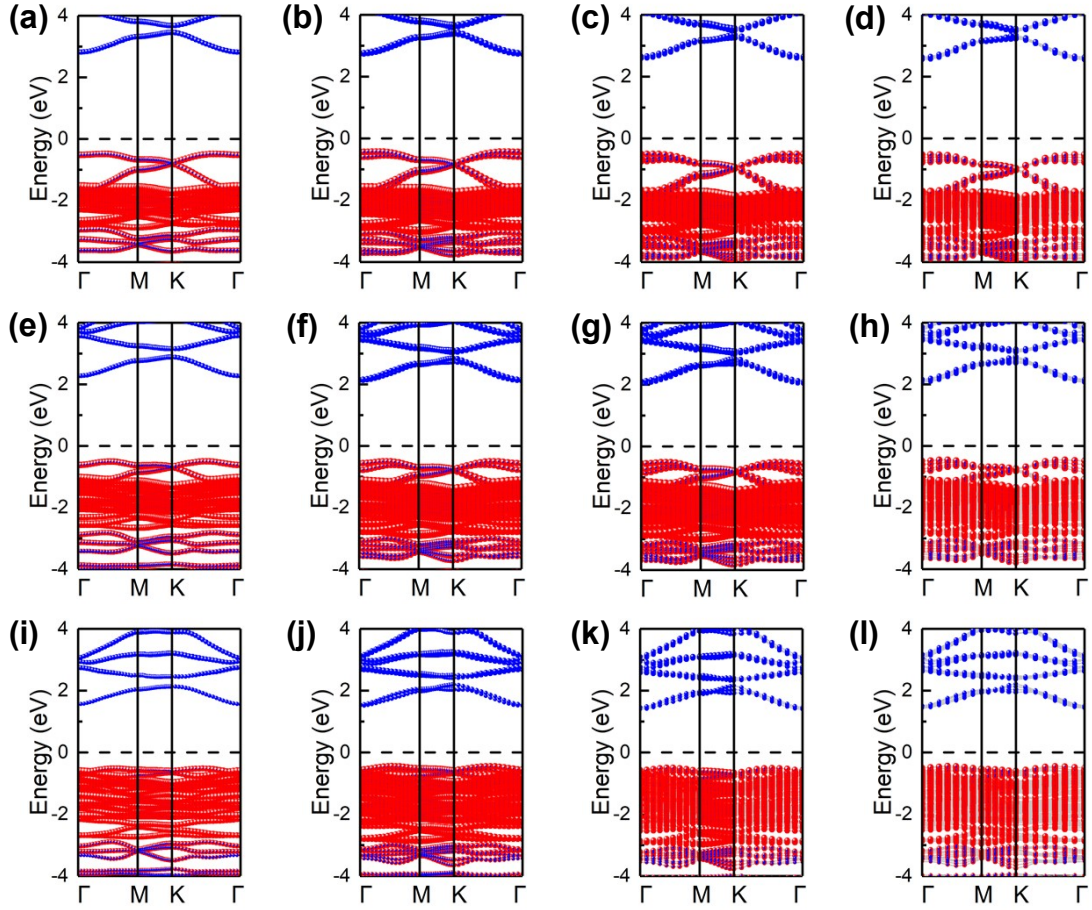

**Fig. S14** Thickness effect on band structures of 2D T-phase  $\text{Cs}_3\text{Bi}_2\text{X}_9$  ( $\text{X} = \text{Cl}, \text{Br}, \text{I}$ ) nanosheets. Projected band structure of (a-d)  $\text{Cs}_3\text{Bi}_2\text{Cl}_9$ , (e-h)  $\text{Cs}_3\text{Bi}_2\text{Br}_9$ , (i-l)  $\text{Cs}_3\text{Bi}_2\text{I}_9$  with the thickness range from the monolayer (1L) to tetralayer (4L). The blue and red bands are contributed by Bi and X, respectively. The dash lines denote the position of Fermi level.

### S11. Thickness effect on optical absorption of 2D T-phase $\text{Cs}_3\text{B}_2\text{X}_9$ nanosheets

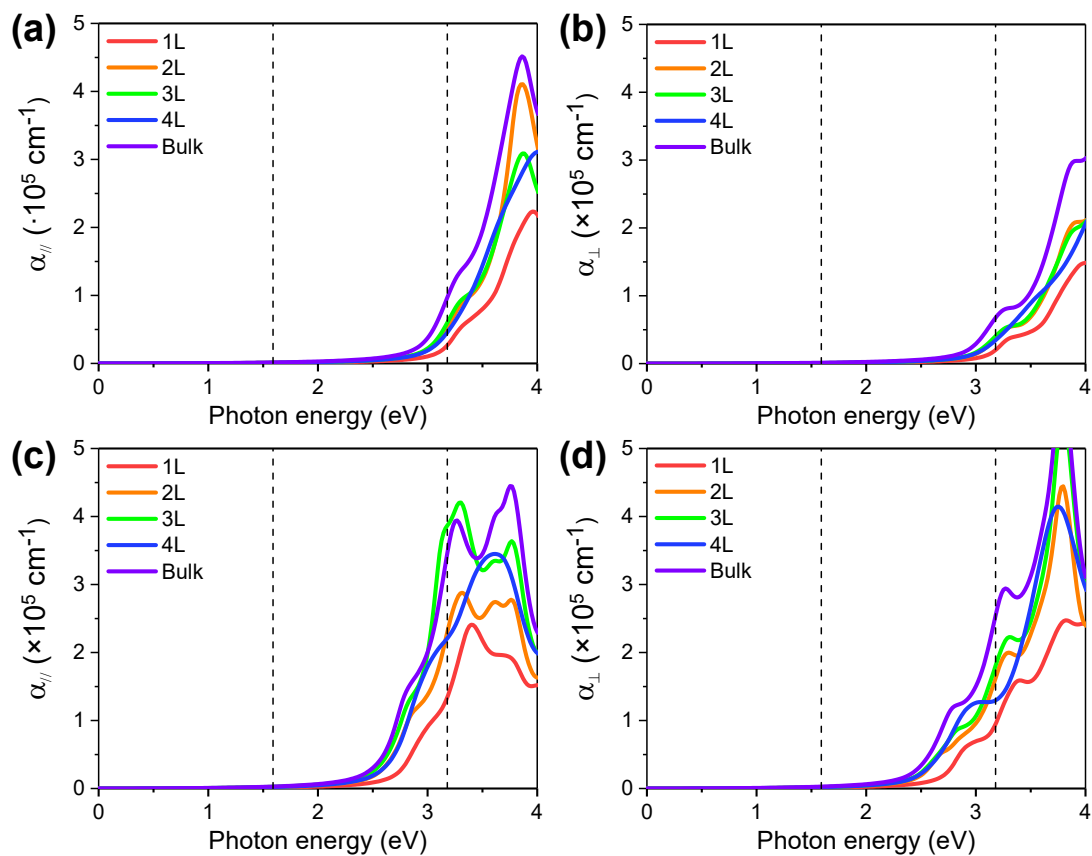

**Fig. S15** Thickness effect on optical absorption spectra of 2D T-phase  $\text{Cs}_3\text{Sb}_2\text{X}_9$  (X = Cl, Br) nanosheets. (a,b) Optical absorption spectra of 2D T-phase  $\text{Cs}_3\text{Sb}_2\text{Cl}_9$  nanosheets with the thickness range from 1L to 4L along the (a) in-plane ( $\alpha_{//}$ ) and (b) out-of-plane ( $\alpha_{\perp}$ ) polarization direction. (c,d) Optical absorption spectra of 2D T-phase  $\text{Cs}_3\text{Sb}_2\text{Br}_9$  nanosheets with the thickness range from 1L to 4L along the (c) in-plane ( $\alpha_{//}$ ) and (d) out-of-plane ( $\alpha_{\perp}$ ) polarization direction. The range of dash lines corresponds to the visible region with the range of wavelength from 390 to 780 nm.

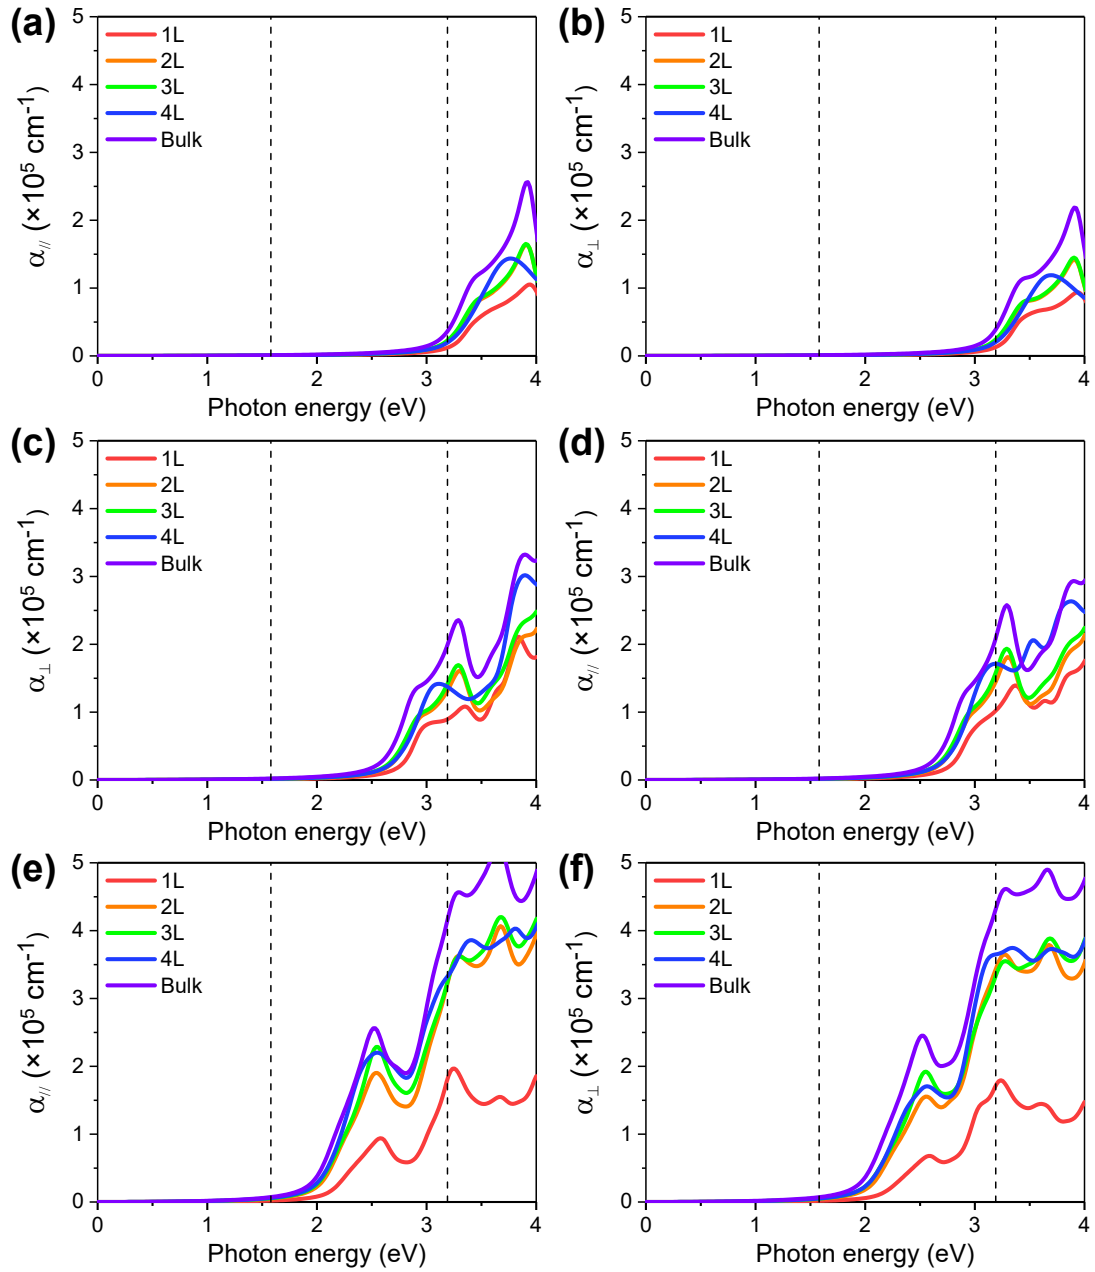

**Fig. S16** Thickness effect on optical absorption spectra of 2D T-phase  $\text{Cs}_3\text{Bi}_2\text{X}_9$  ( $X = \text{Cl}, \text{Br}, \text{I}$ ) nanosheets. (a,b) Optical absorption spectra of 2D T-phase  $\text{Cs}_3\text{Bi}_2\text{Cl}_9$  nanosheets with the thickness range from 1L to 4L along the (a) in-plane ( $\alpha_{//}$ ) and (b) out-of-plane ( $\alpha_{\perp}$ ) polarization direction. (c,d) Optical absorption spectra of 2D T-phase  $\text{Cs}_3\text{Bi}_2\text{Br}_9$  nanosheets with the thickness range from 1L to 4L along the (c) in-plane ( $\alpha_{//}$ ) and (d) out-of-plane ( $\alpha_{\perp}$ ) polarization direction. (e,f) Optical absorption spectra of 2D T-phase  $\text{Cs}_3\text{Bi}_2\text{I}_9$  nanosheets with the thickness range from 1L to 4L along the (e) in-plane ( $\alpha_{//}$ ) and (f) out-of-plane ( $\alpha_{\perp}$ ) polarization direction. The range of dash lines corresponds to the visible region with the range of wavelength from 390 to 780 nm.

## References

- 1 A. Pradhan, S. C. Sahoo, A. K. Sahu and S. L. Samal, *Cryst. Growth Des.*, 2020, **20**, 3386-3395.
- 2 J. Mao, Z. Zheng, Z. Xiong, P. Huang, G. Ding, R. Wang, Z. Wang, J. Yang, Y. Zhou, T. Zhai and S. Han, *Nano Energy*, 2020, **71**, 104616.
- 3 K. M. McCall, Z. Liu, G. Trimarchi, C. C. Stoumpos, W. Lin, Y. He, I. Hadar, M. G. Kanatzidis and B. W. Wessels, *ACS Photonics* 2018, **5**, 3748-3762.
- 4 J. Mei, M. Liu, P. Vivo and V. Pecunia, *Adv. Funct. Mater.*, 2021, **31**, 2106295.
- 5 T. Geng, Y. Shi, Z. Liu, D. Zhao, Z. Ma, K. Wang, Q. Dong, G. Xiao and B. Zou, *J. Phys. Chem. Lett.*, 2022, **13**, 11837-11843.
- 6 J. Jin, L. N. Quan, M. Gao, C. Chen, P. Guo and P. Yang, *J. Phys. Chem. C*, 2023, **127**, 3523-3531.
- 7 J. Zhang, Y. Yang, H. Deng, U. Farooq, X. Yang, J. Khan, J. Tang and H. Song, *ACS Nano*, 2017, **11**, 9294-9302.
- 8 K. M. McCall, C. C. Stoumpos, S. S. Kostina, M. G. Kanatzidis and B. W. Wessels, *Chem. Mater.*, 2017, **29**, 4129-4145.
- 9 S. H. Wei and S. B. Zhang, *Phys. Rev. B*, 2002, **66**, 155211.
